# Supplementary material for: An experimental framework to assess biomolecular condensates in bacteria
Source: PubMed Central journal article supplement (PMC11018776; doi:10.1038/s41467-024-47330-4), 2024-04-15
Supplement: 41467_2024_47330_MOESM12_ESM.pdf [file 41467_2024_47330_MOESM12_ESM.pdf]

**Title: Supplementary Movie 1.**

**Description: Overexpressed mNG-McdB forms foci.** Indicated *E. coli* BL21 strains were induced with 1 mM IPTG for expression of mNG-McdB. Time-lapse movies from 0 to 4 h post-induction were recorded. The phase contrast channel is shown in gray and the mNG channel is in green. This video is representative of three biological replicates. Scale bar: 5  $\mu\text{m}$ .

**Title: Supplementary Movie 2.**

**Description: Effects of changing cell volume on mNG-McdB focus stability.** *E. coli* cell volume was increased by treating cells with the MreB inhibitor, A22 (10  $\mu\text{g/ml}$ ). Scale bar: 2  $\mu\text{m}$ .

**Title: Supplementary Movie 3.**

**Description: Effects of changing cell volume on mNG-cl<sup>agg</sup> focus stability.** *E. coli* cell volume was increased by treating cells with the MreB inhibitor, A22 (10  $\mu\text{g/ml}$ ). Scale bar: 2  $\mu\text{m}$ .

**Title: Supplementary Movie 4.**

**Description: Localized lysis of the cell.** One cell pole was lysed using a high-intensity laser. The time-lapse video shows solubilization of the opposing focus and shift of the fluorescent signal to the opposite end. Scale bar: 1  $\mu\text{m}$ .

**Title: Supplementary Movie 5.**

**Description: mCherry-McdB<sup>sol</sup> condenses by repulsive interactions with the nucleoid.** mCherry-McdB (left) and mCherry-McdB<sup>sol</sup> (right) foci in *E. coli* at 4 h post-induction. Cells were treated with ciprofloxacin (50 mM) for nucleoid compaction and stained with DAPI (2  $\mu\text{M}$ ) for nucleoid visualization (bottom). Merged images of mCherry (green), DAPI (magenta), and phase contrast (blue) channels are shown. The video is representative of three biological replicates. Scale bars: 1  $\mu\text{m}$ .

**Title: Supplementary Movie 6.**

**Description: Generational dilution dissolves condensates.** Phase contrast channel (gray), mCherry channel (green), and merged images are shown. Images are representative of four biological replicates. Scale bar: 2  $\mu\text{m}$ .

**Title: Supplementary Movie 7.**

**Description: Cell elongation dissolves phase-separated condensates.** Cells were treated with 10  $\mu\text{g/ml}$  cephalixin to block cell division. Phase contrast (gray), mCherry channel (green), and merged images are shown. Images are representative of four biological replicates. Scale bar: 2  $\mu\text{m}$ .

**Title: Supplementary Movie 8.**

**Description: Effects of temperature shift on focus stability.** Cells that formed foci were incubated at 4  $^{\circ}\text{C}$  for one hour and then transitioned to 37  $^{\circ}\text{C}$  in a stage-top incubator. Scale bar: 1  $\mu\text{m}$ .
